# Supplementary material for: Hydrothermal synthesis of Ag/β-AgVO3 nanobelts with enhanced performance as a cathode material for lithium batteries
Source: Royal Society of Chemistry journal article supplement (doi:10.1039/c3ce41496e), 2013-01-01
Supplement: c3ce41496e.pdf [file c3ce41496e.pdf]

## Supporting Information

### Hydrothermal synthesis of Ag/ $\beta$ -AgVO<sub>3</sub> nanobelts with enhanced performance as cathode material for lithium batteries

Shuquan Liang,<sup>a,b</sup> Jiang Zhou,\*<sup>a</sup> Xuelin Zhang,<sup>a</sup> Yan Tang,\*<sup>a,b</sup> Guozhao Fang,<sup>a</sup> Tao Chen,<sup>a</sup> Xiaoping Tan<sup>a,b</sup>

<sup>a</sup> School of Material Science and Engineering, Central South University, Changsha 410083, Hunan, China

<sup>b</sup> Key Laboratory of Nonferrous Metal Materials Science and Engineering, Ministry of Education, Central South University, Changsha 410083, Hunan, China

---

\* Corresponding author. Tel.: +86 0731 88836069. Fax: +86 0731 88876692.

E-mail address: ty\_csua@126.com (Y. Tang); zhoujiangcsu@gmail.com (J. Zhou).

## Experimental section

*Materials synthesis.* All chemicals used in our experiments are of analytical purity and used as received without further purification. The Ag/ $\beta$ -AgVO<sub>3</sub> nanobelts were prepared using Ammonium metavanadate (NH<sub>4</sub>VO<sub>3</sub>,  $\geq 99.0\%$ , Tianjin Guangfu Fine Chemical Research Institute), silver nitrate (AgNO<sub>3</sub>,  $\geq 99.8\%$ , Sinopharm Chemical Reagent Co., Ltd), and hydrogen peroxide (H<sub>2</sub>O<sub>2</sub>,  $\geq 30\%$ , Sinopharm Chemical Reagent Co., Ltd) as starting materials. In a typical procedure, 0.3 g NH<sub>4</sub>VO<sub>3</sub> powder was added into 20 mL of de-ionized water with actively magnetic stirred at room temperature and then 2 mL 30% H<sub>2</sub>O<sub>2</sub> was added and kept continuously stirred for 20 min to form a bright-yellow solution. A stoichiometric amount of AgNO<sub>3</sub> was dissolved in 15 ml deionized water and then was transferred to the above solution with vigorously stirred for another 30 min. The resulting solution was then transferred to a 50 mL autoclave and kept in an electrical oven at 190 °C for 24 h. After cooling down naturally, the precipitates were collected by centrifugation and washed with de-ionized water and anhydrous ethanol several times, following by drying at 60 °C overnight and the Ag/ $\beta$ -AgVO<sub>3</sub> nanobelts obtained.

*Materials characterization.* The phase purity of the as-prepared products were studied by X-ray power diffraction (XRD, Rigaku D/max2500 XRD with Cu K $\alpha$  radiation,  $\lambda=1.54178$  Å). The morphologies and sizes of the as-prepared products were characterized by scanning electron microscopy (SEM, FEI Nova NanoSEM 230) and transmission electron microscopy (TEM, JEOL JEM-2100F). High-resolution transmission electron microscope (HRTEM) and selected-area electron diffraction (SAED) analysis were performed on the JEOL JEM-2100F transmission electron microscope.

*Electrochemical measurements.* The electrochemical properties were carried out by assembly

of coin cells (2025 type coin cell). The cathode slurry was prepared by dispersing the as-prepared products, acetylene black, and polyvinylidene fluoride (PVDF) binder in a weight ratio of 70 : 20 : 10 in a N-methyl-2-pyrrolidone (NMP) solution. The slurry was coated on aluminum foil and dried in a vacuum oven at 90 °C overnight prior to coin-cell assembly. The coin cells contained cathode electrode, metallic lithium, polypropylene separator, and electrolyte of 1 M solution of LiPF<sub>6</sub> in ethylene carbonate/dimethyl carbonate (EC/DMC) (1 : 1, vol.%), were assembled in a glove box (Mbraun, Germany). The galvanostatic charge/discharge performances of the electrodes were evaluated at room temperature (about 35 °C) using an Land Battery Tester (Land CT 2001A, Wuhan, China) within the voltage range of 1.5 V- 3.5 V (vs. Li/Li<sup>+</sup>). The electrochemical impedance spectrometry (EIS) was performed on a ZAHNER-IM6ex electrochemical workstation (ZAHNER Co., Germany) in the frequency range of 100 kHz to 10 mHz. The loading of the MoS<sub>2</sub> cathode material for coin cell test is about 1-2 mg. The specific capacity and current density are based on the weight of Ag/β-AgVO<sub>3</sub> nanobelts only.

## Table and Captions

Table S1 The EIS Simulation Parameters of Ag/ $\beta$ -AgVO<sub>3</sub> nanobelts

| Samples                 | R <sub>s</sub> ( $\Omega$ ) | R <sub>f</sub> ( $\Omega$ ) | R <sub>ct</sub> ( $\Omega$ ) |
|-------------------------|-----------------------------|-----------------------------|------------------------------|
| fresh                   | 2.206                       | 11.02                       | 66.09                        |
| 1 <sup>st</sup> cycle   | 4.795                       | 19.08                       | 64.89                        |
| 100 <sup>th</sup> cycle | 4.025                       | 22.28                       | 71.69                        |

## Figures and Captions

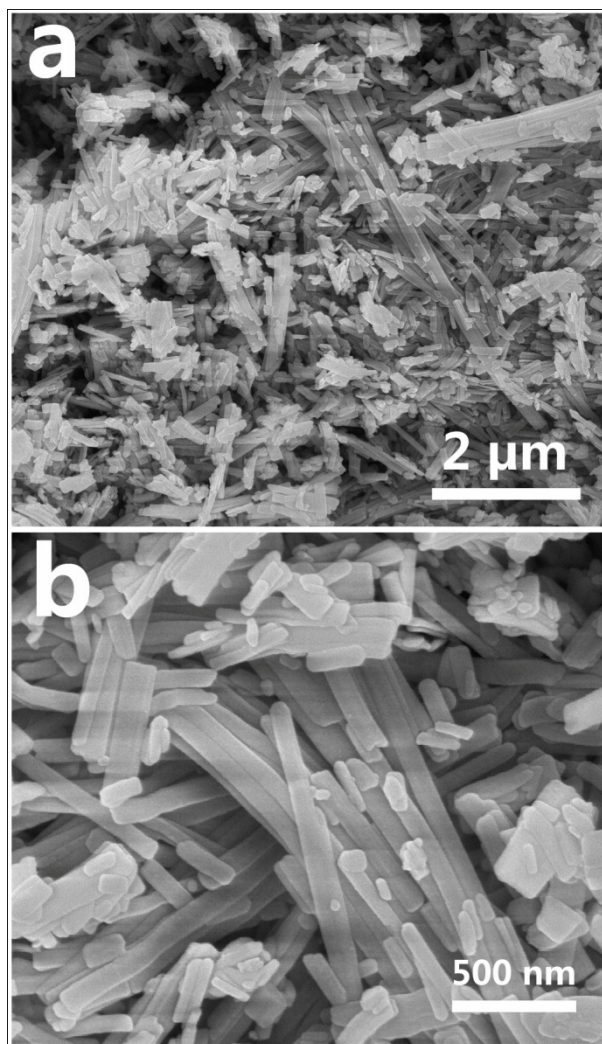

**Figure S1.** SEM images of Ag/β-AgVO<sub>3</sub> nanobelts with different magnifications.
